# Supplementary material for: Cytosolic and endoplasmic reticulum chaperones inhibit wt-p53 to increase cancer cells' survival by refluxing ER-proteins to the cytosol
Source: eLife. 2025 Apr 9;14:e102658. doi: 10.7554/eLife.102658 (PMC11981610; doi:10.7554/eLife.102658)
Supplement: Figure 2—figure supplement 1—source data 3. [file elife-102658-fig2-figsupp1-data3.xlsx]

## Sheet: Related to S2I
Figure 2-figure supplement 1-Source Data 3
Figure 2-figure supplement 1I
	UT			Tm			Tg
WT	1.00038	0.922407	1.14528	1.02261	0.942902	1.17073	1.01149	0.932655	1.15801
DNAJB12 KD	1.00088	1.33227	1.18319	1.02142	1.3596	1.20746	1.01115	1.34594	1.19532
DNAJB14 KD	1.00029	0.843297	0.85867	1.02744	0.866181	0.881972	1.01387	0.854739	0.870321
DNAJB12/14 DKD	1.0022	0.931586	0.906337	0.997384	0.927113	0.901986	0.99979	0.929349	0.904162
