# Supplementary material for: Cytosolic and endoplasmic reticulum chaperones inhibit wt-p53 to increase cancer cells' survival by refluxing ER-proteins to the cytosol
Source: eLife. 2025 Apr 9;14:e102658. doi: 10.7554/eLife.102658 (PMC11981610; doi:10.7554/eLife.102658)
Supplement: Figure 2—figure supplement 1—source data 4. [file elife-102658-fig2-figsupp1-data4.xlsx]

## Sheet: Related to S2J
Figure 2-figure supplement 1-Source Data 4
Figure 2-figure supplement 1J
	UT			Tm			Tg
WT	1.01844	0.93906	1.01266	1.59516	1.5904	1.64742	1.75103	1.62516	1.72414
DNAJB12 KD	1.01243	1.10953	1.0609	1.6414	1.64554	1.6339	1.69608	1.59859	1.69608
DNAJB14 KD	1.01576	0.856338	0.871949	1.69853	1.55219	1.60987	1.63866	1.48609	1.5063
DNAJB12/14 DKD	0.999539	0.929116	0.903935	1.75055	1.62701	1.67097	1.58097	1.46386	1.50074
