# Supplementary material for: Cytosolic and endoplasmic reticulum chaperones inhibit wt-p53 to increase cancer cells' survival by refluxing ER-proteins to the cytosol
Source: eLife. 2025 Apr 9;14:e102658. doi: 10.7554/eLife.102658 (PMC11981610; doi:10.7554/eLife.102658)
Supplement: Figure 2—figure supplement 1—source data 5. [file elife-102658-fig2-figsupp1-data5.xlsx]

## Sheet: Related to S2K
Figure 2-figure supplement 1-Source Data 5
Figure 2-figure supplement 1K
	UT			Tm			Tg
WT	1.02261	0.942902	1.17073	1.73843	1.76029	1.93024	2.27384	2.00293	2.19902
DNAJB12 KD	1.00088	1.23227	1.18319	1.32784	1.76748	1.5697	2.02418	2.19012	2.16045
DNAJB14 KD	1.0011	0.983971	0.935699	1.79521	1.77438	1.79746	2.12714	2.02074	2.25075
DNAJB12/14 DKD	1.0024	0.931772	0.906518	1.99477	1.85423	1.80397	2.24477	2.10423	2.05397
