# Supplementary material for: Cytosolic and endoplasmic reticulum chaperones inhibit wt-p53 to increase cancer cells' survival by refluxing ER-proteins to the cytosol
Source: eLife. 2025 Apr 9;14:e102658. doi: 10.7554/eLife.102658 (PMC11981610; doi:10.7554/eLife.102658)
Supplement: Figure 2—figure supplement 1—source data 6. [file elife-102658-fig2-figsupp1-data6.xlsx]

## Sheet: Related to S2L
Figure 2-figure supplement 1-Source Data 6
Figure 2-figure supplement 1L
	UT			Tm			Tg
WT	1.01705	0.937778	1.16437	1.00316	0.924969	1.08022	1.01149	0.932655	1.0158
DNAJB12 KD	1.01628	1.03528	1.02014	1.00345	1.08309	1.10106	1.01115	1.03459	1.10532
DNAJB14 KD	1.02065	0.86046	0.876146	1.00369	0.846157	0.861583	1.01387	0.854739	0.870321
DNAJB12/14 DKD	0.998587	0.928231	0.903074	1.00159	0.931026	0.905793	0.99979	0.929349	0.904162
