# Supplementary material for: Cytosolic and endoplasmic reticulum chaperones inhibit wt-p53 to increase cancer cells' survival by refluxing ER-proteins to the cytosol
Source: eLife. 2025 Apr 9;14:e102658. doi: 10.7554/eLife.102658 (PMC11981610; doi:10.7554/eLife.102658)
Supplement: Figure 2—figure supplement 1—source data 7. [file elife-102658-fig2-figsupp1-data7.xlsx]

## Sheet: Related to S2M
Figure 2-figure supplement 1-Source Data 7
Figure 2-figure supplement 1M
	UT			Tm			Tg
WT	1.01983	0.94034	1.16755	1.52901	1.40984	1.64648	1.81086	1.7207	1.81006
DNAJB12 KD	1.00858	1.10838	1.10166	1.52946	1.53686	1.56782	1.81025	1.85222	1.90288
DNAJB14 KD	1.01087	0.852216	0.867752	1.52982	1.28971	1.31322	1.71511	1.53022	1.55812
DNAJB12/14 DKD	1.10049	0.930002	0.904796	1.52663	1.43907	1.38061	1.78991	1.6638	1.61871
