# Supplementary material for: Cytosolic and endoplasmic reticulum chaperones inhibit wt-p53 to increase cancer cells' survival by refluxing ER-proteins to the cytosol
Source: eLife. 2025 Apr 9;14:e102658. doi: 10.7554/eLife.102658 (PMC11981610; doi:10.7554/eLife.102658)
Supplement: Figure 2—figure supplement 1—source data 8. [file elife-102658-fig2-figsupp1-data8.xlsx]

## Sheet: Related to S2G
Figure 2-figure supplement 1-Source Data 9
Figure 2-figure supplement 1g
	UT			Eto			Eto-Tm
WT	1	1.13434	1.0098	0.928874	1.09104	1.00284	0.894742	1.09097	0.998025
DNAJB12 KD	1.19011	0.99284	1.02003	0.822496	1.28453	0.909014	0.99388	1.39879	1.19204
DNAJB14 KD	0.964488	1.0003	1.0092	0.974392	0.978294	0.987382	1.06436	1.20997	1.19803
DNAJB12/14 DKD	0.834989	0.999395	1.01003	1.03093	0.398986	0.793872	0.982743	0.902497	0.989792
