# Supplementary material for: Cytosolic and endoplasmic reticulum chaperones inhibit wt-p53 to increase cancer cells' survival by refluxing ER-proteins to the cytosol
Source: eLife. 2025 Apr 9;14:e102658. doi: 10.7554/eLife.102658 (PMC11981610; doi:10.7554/eLife.102658)
Supplement: Figure 2—figure supplement 1—source data 10. [file elife-102658-fig2-figsupp1-data10.xlsx]

## Sheet: Related to S2H
Figure 2-figure supplement 1-Source Data 10
Figure 2-figure supplement 1H
	UT			Eto			Eto-Tm
WT	1	1.18794	1.05095	0.961925	1.11119	1.04329	0.92438	1.14024	1.03799
DNAJB12 KD	1.24929	1.03229	1.06679	0.863619	1.35315	0.940079	1.03343	1.47884	1.25141
DNAJB14 KD	1.09896	1.0405	1.05029	1.012	1.06729	1.02628	1.11096	1.27114	1.258
DNAJB12/14 DKD	0.858651	1.04089	1.05562	1.07418	0.490183	0.813424	1.02118	0.932911	1.02894
