# Supplementary material for: Cytosolic and endoplasmic reticulum chaperones inhibit wt-p53 to increase cancer cells' survival by refluxing ER-proteins to the cytosol
Source: eLife. 2025 Apr 9;14:e102658. doi: 10.7554/eLife.102658 (PMC11981610; doi:10.7554/eLife.102658)
Supplement: Figure 2—source data 3. [file elife-102658-fig2-data3.xlsx]

## Sheet: Related to 2A
Figure 2-Source Data 3
Figure 2A Summary of western blot quantifications
	UT			Tm150			Tm250			Tg50
Scramble	2.88661	4.50823	3.08389	47.2447	35.8343	40.2486	47.5186	44.4397	44.2036	42.7954	38.2049	42.236
D12 KD	5.0962	6.38423	5.03848	32.055	31.2049	29.2845	31.6534	21.9306	19.3375	33.9774	32.3328	32.2589
D14 KD	3.02757	2.00238	2.9131	29.9654	21.8103	23.235	20.6078	18.1398	19.3248	25.0178	25.0895	24.4584
D12D14 DKD	1.22189	1.2938	6.2974	0.345824	5.29734	10.3233	0.0404651	2.20488	11.2489	0.485728	5.28975	8.24957
Average	3.49291			41.1092			45.3873			41.0787
	5.5063			30.8481			24.3072			32.8564
	2.64768			25.0035			19.3575			24.8552
	2.9377			5.32216			4.49809			4.67502
