# Supplementary material for: Cytosolic and endoplasmic reticulum chaperones inhibit wt-p53 to increase cancer cells' survival by refluxing ER-proteins to the cytosol
Source: eLife. 2025 Apr 9;14:e102658. doi: 10.7554/eLife.102658 (PMC11981610; doi:10.7554/eLife.102658)
Supplement: Figure 2—source data 4. [file elife-102658-fig2-data4.xlsx]

## Sheet: Related to 2B
Figure 2-Source Data 4
Figure 2B Summary of western blot quantifications
	UT			Tm150			Tm250			Tg50
Scramble	8.36808	8.23189	8.2305	34.9269	34.9205	36.0311	33.0101	33.3244	31.2485	24.3993	23.306	21.4354
D12 KD	3.22775	3.10834	3.20845	23.7469	19.6391	18.629	24.7116	23.1309	23.3295	25.4212	19.3259	21.435
D14 KD	6.60292	6.1834	7.2348	27.3733	32.934	26.7184	41.7441	38.2944	39.2494	42.2486	39.2431	33.3249
D12D14 DKD	9.93855	3.13084	2.13241	23.1105	10.3204	13.1325	6.91316	10.2395	11.3214	12.4642	10.384	9.29457
Average	8.27682			35.2928			32.5277			23.0469
	3.18151			20.6716			23.724			22.0607
	6.67371			29.0085			39.7626			38.2722
	5.06727			15.5211			9.49134			10.7142
