# Supplementary material for: Cytosolic and endoplasmic reticulum chaperones inhibit wt-p53 to increase cancer cells' survival by refluxing ER-proteins to the cytosol
Source: eLife. 2025 Apr 9;14:e102658. doi: 10.7554/eLife.102658 (PMC11981610; doi:10.7554/eLife.102658)
Supplement: Figure 2—source data 5. [file elife-102658-fig2-data5.xlsx]

## Sheet: Related to 2C
Figure 2-Source Data 5
Figure 2C Summary of western blot quantifications
	UT			Tm150			Tm250			Tg50
Scramble	9.34724	10.2754	7.97344	58.0859	45.0398	49.2857	50.2733	50.3268	45.2764	44.5235	45.5249	38.8937
D12 KD	12.2974	11.21	8.90482	55.554	49.9864	49.9719	54.8051	49.1248	48.125	19.52	21.2485	19.2336
D14 KD	14.9285	12.8735	14.2397	56.065	50.9297	50.9419	56.0987	34.2395	21.8295	57.1957	39.309	34.9397
D12D14 DKD	0.32947	0.469872	3.1974	1.01889	9.87542	12.2459	0.332278	5.24794	9.12948	0.243074	1.4284	9.32458
Average	9.19871			50.8038			48.6255			42.9807
	10.8041			51.8374			50.685			20.0007
	14.0139			52.6455			37.3892			43.8148
	1.33225			7.71339			4.90323			3.66535
