# Supplementary material for: Cytosolic and endoplasmic reticulum chaperones inhibit wt-p53 to increase cancer cells' survival by refluxing ER-proteins to the cytosol
Source: eLife. 2025 Apr 9;14:e102658. doi: 10.7554/eLife.102658 (PMC11981610; doi:10.7554/eLife.102658)
Supplement: Figure 2—source data 6. [file elife-102658-fig2-data6.xlsx]

## Sheet: Related to 2E
Figure 2-Source Data 6
Figure 2E Summary of western blot quantifications
	UT			Eto			Eto-Tm
Scramble	1	1	1	4.62355	3.91097	4.8084	2.02375	2.12303	1.9399
D12 KD	1	1	1	4.23421	4.19248	3.94035	1.83477	2.39025	1.98025
D14 KD	1	1	1	3.70956	3.18324	3.13894	1.85596	1.98392	2.1324
D12D14 DKD	1	1	1	4.90294	4.38946	3.99723	2.82941	2.90192	3.01181
Average	1			4.44764			2.02889
	1			4.12235			2.06842
	1			3.34392			1.99076
	1			4.42988			2.91438
