# Supplementary material for: Cytosolic and endoplasmic reticulum chaperones inhibit wt-p53 to increase cancer cells' survival by refluxing ER-proteins to the cytosol
Source: eLife. 2025 Apr 9;14:e102658. doi: 10.7554/eLife.102658 (PMC11981610; doi:10.7554/eLife.102658)
Supplement: Figure 2—source data 7. [file elife-102658-fig2-data7.xlsx]

## Sheet: Related to 2F
Figure 2-Source Data 7
Figure 2F Summary of western blot quantifications
	UT			Eto			Eto-Tm
Scramble	1	1	1	2.79844	3.02094	2.51984	0.95676	1.3244	1.13243
D12 KD	1	1	1	2.53025	2.89199	2.58312	1.96456	1.4908	1.68382
D14 KD	1	1	1	2.7651	2.83432	2.65132	1.42934	1.30844	1.03085
D12D14 DKD	1	1	1	3.82082	3.82324	4.1224	3.24055	2.6019	3.12987
Average		1			2.77974			1.13786
		1			2.66845			1.71306
		1			2.75025			1.25621
		1			3.92215			2.99077
