# Supplementary material for: Cytosolic and endoplasmic reticulum chaperones inhibit wt-p53 to increase cancer cells' survival by refluxing ER-proteins to the cytosol
Source: eLife. 2025 Apr 9;14:e102658. doi: 10.7554/eLife.102658 (PMC11981610; doi:10.7554/eLife.102658)
Supplement: Figure 2—source data 8. [file elife-102658-fig2-data8.xlsx]

## Sheet: Related to 2G
Figure 2-Source Data 8
Figure 2G Summary of western blot quantifications
	UT			Eto			Eto-Tm
Scramble	1	1	1	5.80217	6.22409	6.01313	2.05194	0.897954	1.47495
D12 KD	1	1	1	5.99921	3.91347	3.84673	1.681	2.56868	2.18389
D14 KD	1	1	1	4.68045	5.25003	5.65243	2.98573	3.89016	3.09657
D12D14 DKD	1	1	1	9.0626	8.29375	8.65985	6.09026	8.01744	6.53851
Average		1			6.01313			1.47495
		1			4.58647			2.14452
		1			5.1943			3.32415
		1			8.67206			6.88207
