# Supplementary material for: Cytosolic and endoplasmic reticulum chaperones inhibit wt-p53 to increase cancer cells' survival by refluxing ER-proteins to the cytosol
Source: eLife. 2025 Apr 9;14:e102658. doi: 10.7554/eLife.102658 (PMC11981610; doi:10.7554/eLife.102658)
Supplement: Figure 2—source data 9. [file elife-102658-fig2-data9.xlsx]

## Sheet: Related to 2H
Figure 2-Source Data 9
Figure 2H Summary of p53 Luciferase activity
	UT			Eto			Eto-Tm
Scramble	1.23489	1.04829	1	5.09436	5.00498	5.65055	1.6305	2.14794	2.23848
D12 KD	0.94324	1.39083	1	4.94096	4.94855	5.90594	3.01459	3.02849	2.59345
D14 KD	1.2903	0.842938	1	5.80945	4.94957	5.3459	3.03589	2.49475	3.0874
D12D14 DKD	1.09346	1.08457	1	5.28945	5.70955	5.29458	4.67745	4.29847	4.39474
Average		1			5.24996			2.00564
		1			5.26515			2.87884
		1			5.36831			2.87268
		1			5.43119			4.45689
