# Supplementary material for: Cytosolic and endoplasmic reticulum chaperones inhibit wt-p53 to increase cancer cells' survival by refluxing ER-proteins to the cytosol
Source: eLife. 2025 Apr 9;14:e102658. doi: 10.7554/eLife.102658 (PMC11981610; doi:10.7554/eLife.102658)
Supplement: Figure 3—figure supplement 1—source data 3. [file elife-102658-fig3-figsupp1-data3.xlsx]

## Sheet: Related to Figure S3C
Figure 3-figure supplement 1-Source Data 3
Figure 3-figure supplement 1C
	CTRL			12WT			14WT			12H136Q			14H136Q
Control	1.25112	0.990209	1	1.39089	1.00922	1.09039	0.911191	1.20909	1.10032	1.16914	1.25303	0.989137	1.31835	1.00019	0.965184
XBP1	1.01111	0.990914	1	1.05199	1.059	0.962392	1.15119	1.19416	0.823827	1.24137	0.709972	1.02921	1.10908	0.970141	1.10189
BIP
