# Supplementary material for: Cytosolic and endoplasmic reticulum chaperones inhibit wt-p53 to increase cancer cells' survival by refluxing ER-proteins to the cytosol
Source: eLife. 2025 Apr 9;14:e102658. doi: 10.7554/eLife.102658 (PMC11981610; doi:10.7554/eLife.102658)
Supplement: Figure 3—figure supplement 1—source data 4. [file elife-102658-fig3-figsupp1-data4.xlsx]

## Sheet: Related to Figure S3D
Figure 3-figure supplement 1-Source Data 4
Figure 3-figure supplement 1D
	UT			Dox5
Control	1	1.23847	0.837249	1.19987	1.08739	1.00987
DNAJB12 OE	1	1.2009	0.986423	1.00989	1.28793	1.10832
DNAJB12 -HPD OE	1	0.978724	0.988427	0.886592	1.10903	1.20983
