# Supplementary material for: Cytosolic and endoplasmic reticulum chaperones inhibit wt-p53 to increase cancer cells' survival by refluxing ER-proteins to the cytosol
Source: eLife. 2025 Apr 9;14:e102658. doi: 10.7554/eLife.102658 (PMC11981610; doi:10.7554/eLife.102658)
Supplement: Figure 3—figure supplement 1—source data 5. [file elife-102658-fig3-figsupp1-data5.xlsx]

## Sheet: Related to Figure S3E
Figure 3-figure supplement 1-Source Data 5
Figure 3-figure supplement 1E
	UT			Dox5
Control	1.00699	1.02674	1.02101	1.0702	1.03352	1.00699
DNAJB12 OE	0.926636	0.914628	1.21583	1.1253	1.11552	0.926636
DNAJB12 -HPD OE	1	1.02481	0.954381	1.00029	1.12312	1
