# Supplementary material for: Cytosolic and endoplasmic reticulum chaperones inhibit wt-p53 to increase cancer cells' survival by refluxing ER-proteins to the cytosol
Source: eLife. 2025 Apr 9;14:e102658. doi: 10.7554/eLife.102658 (PMC11981610; doi:10.7554/eLife.102658)
Supplement: Figure 3—figure supplement 1—source data 6. [file elife-102658-fig3-figsupp1-data6.xlsx]

## Sheet: Related to Figure S3F
Figure 3-figure supplement 1-Source Data 6
Figure 3-figure supplement 1F
	UT			Dox5
Control	1	1.02767	1.11091	1.11772	1.03491	1.10957
DNAJB12 OE	1	1.0986	1.09303	1.05644	1.24318	0.99858
DNAJB12 -HPD OE	1	1.09803	1.01834	1.06734	1.03171	1.10506
