# Supplementary material for: Cytosolic and endoplasmic reticulum chaperones inhibit wt-p53 to increase cancer cells' survival by refluxing ER-proteins to the cytosol
Source: eLife. 2025 Apr 9;14:e102658. doi: 10.7554/eLife.102658 (PMC11981610; doi:10.7554/eLife.102658)
Supplement: Figure 3—figure supplement 1—source data 7. [file elife-102658-fig3-figsupp1-data7.xlsx]

## Sheet: Related to Figure S3G
Figure 3-figure supplement 1-Source Data 7
Figure 3-figure supplement 1G
	UT			Dox5
Control	1	1.03557	0.98243	1.20927	1.00029	0.929802
DNAJB12 OE	1	1.10299	1.19844	0.88884	1.23879	1.08927
DNAJB12 -HPD OE	1	1.24809	0.954381	1.00029	1.12312	1.19484
