# Supplementary material for: Cytosolic and endoplasmic reticulum chaperones inhibit wt-p53 to increase cancer cells' survival by refluxing ER-proteins to the cytosol
Source: eLife. 2025 Apr 9;14:e102658. doi: 10.7554/eLife.102658 (PMC11981610; doi:10.7554/eLife.102658)
Supplement: Figure 3—figure supplement 1—source data 8. [file elife-102658-fig3-figsupp1-data8.xlsx]

## Sheet: Related to Figure S3H
Figure 3-figure supplement 1-Source Data 8
Figure 3-figure supplement 1H
	Control			DNAJB12 WT			DNAJB14 WT			DNAJB12-H136Q	DNAJB12-H136Q		DNAJB14-H139Q
24	100	101.22	98.4389	91.2893	85.1398	88.1383	93.3289	88.1325	93.9374	99.3204	93.2439	88.3248	98.1398	89.2375	91.9833
48	96.2408	98.2344	100.233	50.9133	49.2489	49.7483	76.2485	88.2349	60.4306	89.3924	95.2947	97.235	94.249	98.235	99.1328
72	100.234	99.9384	92.4385	20.1329	21.0894	10	56.925	56.992	61.0138	91.2328	89.1328	99.2133	92.3289	99.9238	101.324
