# Supplementary material for: Cytosolic and endoplasmic reticulum chaperones inhibit wt-p53 to increase cancer cells' survival by refluxing ER-proteins to the cytosol
Source: eLife. 2025 Apr 9;14:e102658. doi: 10.7554/eLife.102658 (PMC11981610; doi:10.7554/eLife.102658)
Supplement: Figure 3—source data 3. [file elife-102658-fig3-data3.xlsx]

## Sheet: Related to 3A
Figure 3-Source Data 3
Figure 2A Summary of p53 activity
	Ut			eto
empty	1	1.19839	1.00828	5.83925	5.00898	4.99139
D12-WT	1	0.933839	1.12228	3.2909	2.19278	2.9821
D12-H139Q	1	1.28024	1.39929	4.37837	4.07691	7.19874
