# Supplementary material for: Cytosolic and endoplasmic reticulum chaperones inhibit wt-p53 to increase cancer cells' survival by refluxing ER-proteins to the cytosol
Source: eLife. 2025 Apr 9;14:e102658. doi: 10.7554/eLife.102658 (PMC11981610; doi:10.7554/eLife.102658)
Supplement: Figure 3—source data 4. [file elife-102658-fig3-data4.xlsx]

## Sheet: Related to 3B
Figure 3-Source Data 4
Figure 2B Summary of p53 activity
	Ut			eto
empty	1	1.2928	1.09812	7.28495	6.28435	5.2485
D12-WT	1	0.937294	1.12932	5.24936	4.84759	5.38597
D12-H139Q	1	1.32108	1.39125	7.30013	6.10835	7.10932
