# Supplementary material for: Cytosolic and endoplasmic reticulum chaperones inhibit wt-p53 to increase cancer cells' survival by refluxing ER-proteins to the cytosol
Source: eLife. 2025 Apr 9;14:e102658. doi: 10.7554/eLife.102658 (PMC11981610; doi:10.7554/eLife.102658)
Supplement: Figure 3—source data 5. [file elife-102658-fig3-data5.xlsx]

## Sheet: Related to 3E
Figure 3-Source Data 5
Figure 2E Summary of western blot quantifications
AGR2
	EMPTY			WT-D12			H136Q-D12
12	5.37266	5.98642	5.7612	38.2739	31.811	31.8272	1.09724	4.18974	4.87194
24	3.98714	4.79237	5.20375	35.4329	31.3018	29.9786	10.9475	2.89372	7.87536
DNAJB11
	EMPTY			WT-D12			H136Q-D12
12	5.87291	5.32452	5.34563	18.2966	18.6325	19.2356	4.40744	4.59206	3.12951
24	4.66727	6.34636	4.46323	17.2508	20.3564	19.2536	3.99631	3.24536	5.34064
HYOU1
	EMPTY			WT-D12			H136Q-D12
12	9.06026	7.87782	9.81179	37.802	35.5818	35.5628	11.4793	5.55693	5.2621
24	9.19203	8.88127	8.63856	37.4211	34.7258	34.1599	7.39993	13.9284	22.6086
