# Supplementary material for: Cytosolic and endoplasmic reticulum chaperones inhibit wt-p53 to increase cancer cells' survival by refluxing ER-proteins to the cytosol
Source: eLife. 2025 Apr 9;14:e102658. doi: 10.7554/eLife.102658 (PMC11981610; doi:10.7554/eLife.102658)
Supplement: Figure 3—source data 6. [file elife-102658-fig3-data6.xlsx]

## Sheet: Related to 3F
Figure 3-Source Data 6
Figure 2F Summary of western blot quantifications
AGR2
	EMPTY			WT-D12			H136Q-D12
12	3.88934	3.43212	3.43954	4.64672	5.44636	3.69499	5.78826	4.87333	5.56702
24	3.88934	3.43212	3.43954	4.78826	4.87333	6.56702	5.17373	3.41105	7.24199
DNAJB11
	EMPTY			WT-D12			H136Q-D12
12	9.56224	6.73444	7.56616	10.0027	10.9783	7.56911	5.66473	7.48328	7.3518
24	8.99643	9.78578	8.27371	11.9798	11.9772	13.0419	6.4213	9.5409	6.06839
HYOU1
	EMPTY			WT-D12			H136Q-D12
12	9.34234	3.54534	5.25038	10.2453	12.2453	5.25643	1.35245	5.08048	4.81093
24	10.2324	9.94832	4.24085	12.4533	13.4632	19.3456	3.10842	7.2486	2.38495
