# Supplementary material for: Cytosolic and endoplasmic reticulum chaperones inhibit wt-p53 to increase cancer cells' survival by refluxing ER-proteins to the cytosol
Source: eLife. 2025 Apr 9;14:e102658. doi: 10.7554/eLife.102658 (PMC11981610; doi:10.7554/eLife.102658)
Supplement: Figure 4—source data 3. [file elife-102658-fig4-data3.xlsx]

## Sheet: Related to 4B
Figure 4-Source Data 3
Figure 4B ER protein accumulation in the cytosol
	AGR2
Empty	1.31617	1.69409	1.93682
Empty Tm	27.1224	26.9581	25.3175
D12 KD	32.8806	25.6127	27.615
D12 Tm	29.1287	27.946	25.1606
D12-H139Q	7.099	8.62221	6.22129
D12-H139Q Tm	3.57342	5.58664	4.59244
