# Supplementary material for: Cytosolic and endoplasmic reticulum chaperones inhibit wt-p53 to increase cancer cells' survival by refluxing ER-proteins to the cytosol
Source: eLife. 2025 Apr 9;14:e102658. doi: 10.7554/eLife.102658 (PMC11981610; doi:10.7554/eLife.102658)
Supplement: Figure 4—source data 4. [file elife-102658-fig4-data4.xlsx]

## Sheet: Related to 4C
Figure 4-Source Data 4
Figure 4C ER protein accumulation in the cytosol
	D11
Empty	2.7978	2.21117	2.10559
Empty Tm	21.1904	21.3944	20.1972
D12 KD	17.9399	18.2323	16.9161
D12 Tm	20.1623	20.5357	19.7679
D12-H139Q	10.2212	10.0417	8.02083
D12-H139Q Tm	10.4987	6.59069	7.29534
