# Supplementary material for: Cytosolic and endoplasmic reticulum chaperones inhibit wt-p53 to increase cancer cells' survival by refluxing ER-proteins to the cytosol
Source: eLife. 2025 Apr 9;14:e102658. doi: 10.7554/eLife.102658 (PMC11981610; doi:10.7554/eLife.102658)
Supplement: Figure 4—source data 5. [file elife-102658-fig4-data5.xlsx]

## Sheet: Related to 4D
Figure 4-Source Data 5
Figure 4D ER protein accumulation in the cytosol
	HYOU1
Empty	1.96831	1.58238	2.30255
Empty Tm	18.9961	18.9578	21.185
D12 KD	20.9174	22.6716	22.4023
D12 Tm	22.4304	24.5803	30.0207
D12-H139Q	7.65538	8.81988	11.2464
D12-H139Q Tm	7.08779	7.81049	11.2245
