# Supplementary material for: Cytosolic and endoplasmic reticulum chaperones inhibit wt-p53 to increase cancer cells' survival by refluxing ER-proteins to the cytosol
Source: eLife. 2025 Apr 9;14:e102658. doi: 10.7554/eLife.102658 (PMC11981610; doi:10.7554/eLife.102658)
Supplement: Figure 4—source data 6. [file elife-102658-fig4-data6.xlsx]

## Sheet: Related to 4E
Figure 4-Source Data 6
Figure 4E ER protein accumulation in the cytosol
	PDI
Empty	2.50641	3.34188	2.50641
Empty Tm	14.8739	16.8319	15.8874
D12 KD	18.884	21.1787	19.884
D12 Tm	21.831	23.414	21.831
D12-H139Q	6.40424	10.0723	6.30424
D12-H139Q Tm	9.34369	9.79159	6.34369
