# Supplementary material for: Cytosolic and endoplasmic reticulum chaperones inhibit wt-p53 to increase cancer cells' survival by refluxing ER-proteins to the cytosol
Source: eLife. 2025 Apr 9;14:e102658. doi: 10.7554/eLife.102658 (PMC11981610; doi:10.7554/eLife.102658)
Supplement: Figure 4—source data 7. [file elife-102658-fig4-data7.xlsx]

## Sheet: Related to 4G
Figure 4-Source Data 7
Figure 4G ER protein accumulation in the cytosol
	AGR2
Empty	3.3579	3.57234	3.50978
Empty Tm	28.9801	28.9809	31.506
D14	8.17732	8.82632	8.87324
D14 Tm	11.2227	7.23141	11.2328
D14-H136Q	4.44828	3.23754	2.28937
D14-H136Q Tm	2.98153	3.82675	4.37286
