# Supplementary material for: Cytosolic and endoplasmic reticulum chaperones inhibit wt-p53 to increase cancer cells' survival by refluxing ER-proteins to the cytosol
Source: eLife. 2025 Apr 9;14:e102658. doi: 10.7554/eLife.102658 (PMC11981610; doi:10.7554/eLife.102658)
Supplement: Figure 4—source data 8. [file elife-102658-fig4-data8.xlsx]

## Sheet: Related to 4H
Figure 4-Source Data 8
Figure 4H ER protein accumulation in the cytosol
	DNAJB11
Empty	2.79487	2.89237	2.29432
Empty Tm	13.2953	14.0328	14.0294
D14	4.94527	2.93894	5.13849
D14 Tm	4.75591	1.39242	3.28974
D14-H136Q	4.69031	1.38803	1.32893
D14-H136Q Tm	6.45591	2.38927	2.8294
