# Supplementary material for: Cytosolic and endoplasmic reticulum chaperones inhibit wt-p53 to increase cancer cells' survival by refluxing ER-proteins to the cytosol
Source: eLife. 2025 Apr 9;14:e102658. doi: 10.7554/eLife.102658 (PMC11981610; doi:10.7554/eLife.102658)
Supplement: Figure 4—source data 9. [file elife-102658-fig4-data9.xlsx]

## Sheet: Related to 4I
Figure 4-Source Data 9
Figure 4I ER protein accumulation in the cytosol
	HYOU1
Empty	4.76246	3.92082	2.44456
Empty Tm	21.9786	19.3832	18.4807
D14	11.4261	8.47536	11.0964
D14 Tm	16.0107	3.3369	13.8836
D14-H136Q	3.42313	5.14104	8.39821
D14-H136Q Tm	10.7995	8.133	5.01371
