# Supplementary material for: Cytosolic and endoplasmic reticulum chaperones inhibit wt-p53 to increase cancer cells' survival by refluxing ER-proteins to the cytosol
Source: eLife. 2025 Apr 9;14:e102658. doi: 10.7554/eLife.102658 (PMC11981610; doi:10.7554/eLife.102658)
Supplement: Figure 4—source data 10. [file elife-102658-fig4-data10.xlsx]

## Sheet: Related to 4J
Figure 4-Source Data 10
Figure 4J ER protein accumulation in the cytosol
	PDI
Empty	7.45428	7.12457	7.81549
Empty Tm	20.0269	19.3279	19.1258
D14	12.551	8.74811	13.8161
D14 Tm	10.9114	7.33363	14.3221
D14-H136Q	12.2308	7.46057	7.63241
D14-H136Q Tm	8.78105	7.61848	7.48108
