# Supplementary material for: Cytosolic and endoplasmic reticulum chaperones inhibit wt-p53 to increase cancer cells' survival by refluxing ER-proteins to the cytosol
Source: eLife. 2025 Apr 9;14:e102658. doi: 10.7554/eLife.102658 (PMC11981610; doi:10.7554/eLife.102658)
Supplement: Figure 5—figure supplement 1—source data 3. [file elife-102658-fig5-figsupp1-data3.xlsx]

## Sheet: Related to S5I
Figure 5-figure supplement 1-Source Data 3
Figure 5-figure supplement 1I
	DNAJB12
UT	1	1.14106	1.07053
Tm	1.19962	0.992482	1.09605
Tg25	0.962713	1.00032	0.981517
Tg50	0.998267	0.999364	0.913051
