# Supplementary material for: Cytosolic and endoplasmic reticulum chaperones inhibit wt-p53 to increase cancer cells' survival by refluxing ER-proteins to the cytosol
Source: eLife. 2025 Apr 9;14:e102658. doi: 10.7554/eLife.102658 (PMC11981610; doi:10.7554/eLife.102658)
Supplement: Figure 5—figure supplement 1—source data 4. [file elife-102658-fig5-figsupp1-data4.xlsx]

## Sheet: Related to S5J
Figure 5-figure supplement 1-Source Data 4
Figure 5-figure supplement 1J
	DNAJB14
UT	0.925318	1.0956	1.01046
Tm	0.81362	1.29876	1.05619
Tg25	0.973112	0.977209	0.97516
Tg50	1.03247	0.936894	0.87007
