# Supplementary material for: Cytosolic and endoplasmic reticulum chaperones inhibit wt-p53 to increase cancer cells' survival by refluxing ER-proteins to the cytosol
Source: eLife. 2025 Apr 9;14:e102658. doi: 10.7554/eLife.102658 (PMC11981610; doi:10.7554/eLife.102658)
Supplement: Figure 5—figure supplement 1—source data 5. [file elife-102658-fig5-figsupp1-data5.xlsx]

## Sheet: Related to S5K-N
Figure 5-figure supplement 1-Source Data 5
Figure 5-figure supplement 1K-N
Summary of each replicate as in K-M and the average in N
	DNAJB14
UT	1	1.00013	0.999382
Tm150	0.764326	0.873555	0.959695
Tmg25	1.70943	0.862902	1.04229
Tg50	3.25094	0.752437	0.959618
