# Supplementary material for: Cytosolic and endoplasmic reticulum chaperones inhibit wt-p53 to increase cancer cells' survival by refluxing ER-proteins to the cytosol
Source: eLife. 2025 Apr 9;14:e102658. doi: 10.7554/eLife.102658 (PMC11981610; doi:10.7554/eLife.102658)
Supplement: Figure 5—figure supplement 1—source data 6. [file elife-102658-fig5-figsupp1-data6.xlsx]

## Sheet: Related to S5O
Figure 5-figure supplement 1-Source Data 6
Figure 5-figure supplement 1O
PC3
	DNAJB14
UT	1.003	1.09033	1.00993
Tm150	1.05854	1.19081	1.09272
Tmg25	1.07356	1.00292	0.927613
Tg50	1.05558	1.10198	1.29281
