# Supplementary material for: Cytosolic and endoplasmic reticulum chaperones inhibit wt-p53 to increase cancer cells' survival by refluxing ER-proteins to the cytosol
Source: eLife. 2025 Apr 9;14:e102658. doi: 10.7554/eLife.102658 (PMC11981610; doi:10.7554/eLife.102658)
Supplement: Figure 6—figure supplement 1—source data 1. [file elife-102658-fig6-figsupp1-data1.xlsx]

## Sheet: Related to Figure S6A
Figure 6-figure supplement 1-Source Data 1
Figure 6-figure supplement 1A
	UT			Eto			Eto-Tm
#1	100	99.9238	100	48.6998	45.9052	49.5311	73.0498	74.8479	75.8475
#2	100	100.789	100.984	42.919	43.3897	43.9388	72.8786	73.8397	77.832
#3	100	98.8736	101.056	48.0979	47.0498	47.484	79.8937	79.2878	82.9093
