# Supplementary material for: Cytosolic and endoplasmic reticulum chaperones inhibit wt-p53 to increase cancer cells' survival by refluxing ER-proteins to the cytosol
Source: eLife. 2025 Apr 9;14:e102658. doi: 10.7554/eLife.102658 (PMC11981610; doi:10.7554/eLife.102658)
Supplement: Figure 6—figure supplement 1—source data 2. [file elife-102658-fig6-figsupp1-data2.xlsx]

## Sheet: Related to Figure S6B
Figure 6-figure supplement 1-Source Data 2
Figure 6-figure supplement 1B
	UT			Eto			Eto-Tm
#1	100	101.39	99.3924	25.4096	25.3828	72.8928	61.4589	69.8494	68.9345
#2	100	101.968	99.2873	35.4855	38.748	61.909	72.392	73.3901	73.9083
#3	100	98.9587	99.3536	43.5943	45.8951	44.8947	71.8948	75.9039	71.2893
