# Supplementary material for: Cytosolic and endoplasmic reticulum chaperones inhibit wt-p53 to increase cancer cells' survival by refluxing ER-proteins to the cytosol
Source: eLife. 2025 Apr 9;14:e102658. doi: 10.7554/eLife.102658 (PMC11981610; doi:10.7554/eLife.102658)
Supplement: Figure 6—figure supplement 1—source data 3. [file elife-102658-fig6-figsupp1-data3.xlsx]

## Sheet: Related to Figure S6C
Figure 6-figure supplement 1-Source Data 3
Figure 6-figure supplement 1C
	UT			Eto			Eto-Tm
#1	100	100.737	100.383	31.8945	32.8379	31.6379	62.3589	61.9681	62.2138
#2	100	101.204	99.5638	30.959	30.8012	29.8927	52.9475	56.9833	53.5672
#3	100	99.3904	100.68	30.8496	31.939	30.082	49.874	50.5628	49.5417
