# Supplementary material for: Cytosolic and endoplasmic reticulum chaperones inhibit wt-p53 to increase cancer cells' survival by refluxing ER-proteins to the cytosol
Source: eLife. 2025 Apr 9;14:e102658. doi: 10.7554/eLife.102658 (PMC11981610; doi:10.7554/eLife.102658)
Supplement: Figure 6—figure supplement 1—source data 4. [file elife-102658-fig6-figsupp1-data4.xlsx]

## Sheet: Related to Figure S6D
Figure 6-figure supplement 1-Source Data 4
Figure 6-figure supplement 1D
	UT			Eto			Eto-Tm
#1	100	99.3204	101.934	25.8945	25.8972	24.6792	19.1874	19.6679	19.5764
#2	100	99.1679	99.9679	19.5453	20.4324	21.9713	29.6847	29.596	29.6599
#3	100	99.5679	100.58	28.458	27.6358	29.1367	22.8474	22.7568	22.8948
