# Supplementary material for: Cytosolic and endoplasmic reticulum chaperones inhibit wt-p53 to increase cancer cells' survival by refluxing ER-proteins to the cytosol
Source: eLife. 2025 Apr 9;14:e102658. doi: 10.7554/eLife.102658 (PMC11981610; doi:10.7554/eLife.102658)
Supplement: Figure 6—source data 1. [file elife-102658-fig6-data1.xlsx]

## Sheet: Related to 6A
Figure 6-Source Data 1
Figure 6A proliferation index
	UT			Eto			Eto-Tm
Scramble	100	99.9238	100	48.6998	46.9052	48.5311	75.8498	75.8479	78.0848
D12 KD	100	101.39	99.3924	33.4096	40.4855	40.5943	61.4589	72.8494	71.9345
D14 KD	100	100	99.3904	30.8945	30.8496	30.459	57.4894	54.9475	54.874
D12D14 DKD	100	99.3204	99.342	30.8945	19.5453	23.458	19.8745	29.8474	23.8474
