# Supplementary material for: Cytosolic and endoplasmic reticulum chaperones inhibit wt-p53 to increase cancer cells' survival by refluxing ER-proteins to the cytosol
Source: eLife. 2025 Apr 9;14:e102658. doi: 10.7554/eLife.102658 (PMC11981610; doi:10.7554/eLife.102658)
Supplement: Figure 6—source data 2. [file elife-102658-fig6-data2.xlsx]

## Sheet: Related to 6B
Figure 6-Source Data 2
Figure 6B proliferation index
	UT			Eto			Eto-Tm
Scramble-i	100	101.134	98.2435	45.5085	44.5244	48.6193	79.249	70.3897	73.3893
SGTA-crispri	100	105.346	99.2975	29.3048	25.2986	15.2988	31.0897	52.205	45.0297
