# Supplementary material for: Cytosolic and endoplasmic reticulum chaperones inhibit wt-p53 to increase cancer cells' survival by refluxing ER-proteins to the cytosol
Source: eLife. 2025 Apr 9;14:e102658. doi: 10.7554/eLife.102658 (PMC11981610; doi:10.7554/eLife.102658)
Supplement: Supplementary file 1. [file elife-102658-supp1.xlsx]

## Sheet: Sheet1
diopt_results_2023-07-23 12:10:25
Input Order	Search Term	Yeast GeneID	SGDID	Yeast Symbol	Species 2	Human GeneID	Human Species Gene ID	Human Symbol	Ensmbl ID (link HPA)	DIOPT Score	Weighted Score	Rank	Best Score	Best Score Reverse	Prediction Derived From	Alignment & Scores	Feedback	Gene Details
1	HLJ1	855196	S000004771	HLJ1	Human	54788	14891	DNAJB12	ENSG00000148719	10	9.68	high	Yes	Yes	Compara, eggNOG, Domainoid, Hieranoid, OMA, OrthoInspector, orthoMCL, Phylome, RoundUp, SonicParanoid		Add	G2F details (DNAJB12) DRscDB Data: (DNAJB12) Human Protein Atlas (HPA)
1	HLJ1	855196	S000004771	HLJ1	Human	79982	25881	DNAJB14	ENSG00000164031	10	9.68	high	Yes	Yes	Compara, eggNOG, Homologene, Domainoid, Hieranoid, OMA, orthoMCL, Phylome, RoundUp, SonicParanoid		Add	G2F details (DNAJB14) DRscDB Data: (DNAJB14) Human Protein Atlas (HPA)
1	HLJ1	855196	S000004771	HLJ1	Human	202052	28429	DNAJC18	ENSG00000170464	7	6.85	moderate	No	Yes	eggNOG, Domainoid, Hieranoid, OMA, Phylome, RoundUp, SonicParanoid		Add	G2F details (DNAJC18) DRscDB Data: (DNAJC18) Human Protein Atlas (HPA)
1	HLJ1	855196	S000004771	HLJ1	Human	3300	5228	DNAJB2	ENSG00000135924	4	3.79	moderate	No	Yes	Compara, eggNOG, Inparanoid, Phylome		Add	G2F details (DNAJB2) DRscDB Data: (DNAJB2) Human Protein Atlas (HPA)
1	HLJ1	855196	S000004771	HLJ1	Human	10049	14888	DNAJB6	ENSG00000105993	4	3.79	moderate	No	Yes	Compara, eggNOG, Inparanoid, Phylome		Add	G2F details (DNAJB6) DRscDB Data: (DNAJB6) Human Protein Atlas (HPA)
1	HLJ1	855196	S000004771	HLJ1	Human	150353	24986	DNAJB7	ENSG00000172404	4	3.79	moderate	No	Yes	Compara, eggNOG, Inparanoid, Phylome		Add	G2F details (DNAJB7) DRscDB Data: (DNAJB7) Human Protein Atlas (HPA)
1	HLJ1	855196	S000004771	HLJ1	Human	165721	23699	DNAJB8	ENSG00000179407	4	3.79	moderate	No	Yes	Compara, eggNOG, Inparanoid, Phylome		Add	G2F details (DNAJB8) DRscDB Data: (DNAJB8) Human Protein Atlas (HPA)
1	HLJ1	855196	S000004771	HLJ1	Human	3337	5270	DNAJB1	ENSG00000132002	4	3.74	moderate	No	No	Compara, eggNOG, Domainoid, Phylome		Add	G2F details (DNAJB1) DRscDB Data: (DNAJB1) Human Protein Atlas (HPA)
1	HLJ1	855196	S000004771	HLJ1	Human	4189	6968	DNAJB9	ENSG00000128590	3	2.77	moderate	No	Yes	eggNOG, TreeFam, Phylome		Add	G2F details (DNAJB9) DRscDB Data: (DNAJB9) Human Protein Atlas (HPA)
1	HLJ1	855196	S000004771	HLJ1	Human	414061	32397	DNAJB3	ENSG00000227802	2	1.96	moderate	No	Yes	Inparanoid, Phylome		Add	G2F details (DNAJB3) DRscDB Data: (DNAJB3) Human Protein Atlas (HPA)
1	HLJ1	855196	S000004771	HLJ1	Human	85406	24581	DNAJC14	ENSG00000135392	2	1.91	moderate	No	Yes	OrthoFinder, Phylome		Add	G2F details (DNAJC14) DRscDB Data: (DNAJC14) Human Protein Atlas (HPA)
1	HLJ1	855196	S000004771	HLJ1	Human	11080	14886	DNAJB4	ENSG00000162616	3	2.81	low	No	No	eggNOG, Domainoid, Phylome		Add	G2F details (DNAJB4) DRscDB Data: (DNAJB4) Human Protein Atlas (HPA)
1	HLJ1	855196	S000004771	HLJ1	Human	25822	14887	DNAJB5	ENSG00000137094	3	2.74	low	No	No	Compara, eggNOG, Phylome		Add	G2F details (DNAJB5) DRscDB Data: (DNAJB5) Human Protein Atlas (HPA)
1	HLJ1	855196	S000004771	HLJ1	Human	51726	14889	DNAJB11	ENSG00000090520	2	1.91	low	No	No	Phylome, SwiftOrtho		Add	G2F details (DNAJB11) DRscDB Data: (DNAJB11) Human Protein Atlas (HPA)
1	HLJ1	855196	S000004771	HLJ1	Human	10294	14884	DNAJA2	ENSG00000069345	2	1.91	low	No	No	Phylome, SwiftOrtho		Add	G2F details (DNAJA2) DRscDB Data: (DNAJA2) Human Protein Atlas (HPA)
1	HLJ1	855196	S000004771	HLJ1	Human	374407	30718	DNAJB13	ENSG00000187726	2	1.81	low	No	No	eggNOG, Phylome		Add	G2F details (DNAJB13) DRscDB Data: (DNAJB13) Human Protein Atlas (HPA)
1	HLJ1	855196	S000004771	HLJ1	Human	134218	27030	DNAJC21	ENSG00000168724	2	1.81	low	No	No	eggNOG, Phylome		Add	G2F details (DNAJC21) DRscDB Data: (DNAJC21) Human Protein Atlas (HPA)
Input Order	Search Term	Yeast GeneID	SGDID	Yeast Symbol	Species 2	Mouse GeneID	Mouse Species Gene ID	Mouse Symbol	Ensmbl ID (link HPA)	DIOPT Score	Weighted Score	Rank	Best Score	Best Score Reverse	Prediction Derived From	Alignment & Scores	Feedback	Gene Details
1	HLJ1	855196	S000004771	HLJ1	Mouse	70604	1917854	Dnajb14		12	11.68	high	Yes	Yes	Compara, eggNOG, Homologene, Domainoid, Hieranoid, OMA, OrthoInspector, orthoMCL, Phylome, RoundUp, SonicParanoid, SwiftOrtho		Add	G2F details (Dnajb14) DRscDB Data: (Dnajb14)
1	HLJ1	855196	S000004771	HLJ1	Mouse	56709	1931881	Dnajb12		10	9.68	moderate	No	Yes	Compara, eggNOG, Domainoid, Hieranoid, OMA, OrthoInspector, orthoMCL, Phylome, RoundUp, SonicParanoid		Add	G2F details (Dnajb12) DRscDB Data: (Dnajb12)
1	HLJ1	855196	S000004771	HLJ1	Mouse	76594	1923844	Dnajc18		7	6.85	moderate	No	Yes	eggNOG, Domainoid, Hieranoid, OMA, Phylome, RoundUp, SonicParanoid		Add	G2F details (Dnajc18) DRscDB Data: (Dnajc18)
1	HLJ1	855196	S000004771	HLJ1	Mouse	23950	1344381	Dnajb6		4	3.74	moderate	No	No	Compara, eggNOG, Phylome, SwiftOrtho		Add	G2F details (Dnajb6) DRscDB Data: (Dnajb6)
1	HLJ1	855196	S000004771	HLJ1	Mouse	57755	1914012	Dnajb7		4	3.74	moderate	No	Yes	Compara, eggNOG, Phylome, SwiftOrtho		Add	G2F details (Dnajb7) DRscDB Data: (Dnajb7)
1	HLJ1	855196	S000004771	HLJ1	Mouse	56691	1922801	Dnajb8		4	3.74	moderate	No	Yes	Compara, eggNOG, Phylome, SwiftOrtho		Add	G2F details (Dnajb8) DRscDB Data: (Dnajb8)
1	HLJ1	855196	S000004771	HLJ1	Mouse	74330	1921580	Dnajc14		3	2.91	moderate	No	Yes	OrthoFinder, Phylome, SwiftOrtho		Add	G2F details (Dnajc14) DRscDB Data: (Dnajc14)
1	HLJ1	855196	S000004771	HLJ1	Mouse	27362	1351618	Dnajb9		3	2.77	moderate	No	Yes	eggNOG, TreeFam, Phylome		Add	G2F details (Dnajb9) DRscDB Data: (Dnajb9)
1	HLJ1	855196	S000004771	HLJ1	Mouse	15504	1306822	Dnajb3		3	2.74	moderate	No	Yes	Compara, eggNOG, Phylome		Add	G2F details (Dnajb3) DRscDB Data: (Dnajb3)
1	HLJ1	855196	S000004771	HLJ1	Mouse	56812	1928739	Dnajb2		3	2.74	moderate	No	Yes	Compara, eggNOG, Phylome		Add	G2F details (Dnajb2) DRscDB Data: (Dnajb2)
1	HLJ1	855196	S000004771	HLJ1	Mouse	75015	2686498	Samd13		3	2.74	moderate	No	Yes	Compara, eggNOG, Phylome		Add	G2F details (Samd13) DRscDB Data: (Samd13)
1	HLJ1	855196	S000004771	HLJ1	Mouse	230935	2443386	Dnajc11		2	1.91	moderate	No	Yes	Phylome, SwiftOrtho		Add	G2F details (Dnajc11) DRscDB Data: (Dnajc11)
1	HLJ1	855196	S000004771	HLJ1	Mouse	81489	1931874	Dnajb1		3	2.74	low	No	No	Compara, eggNOG, Phylome		Add	G2F details (Dnajb1) DRscDB Data: (Dnajb1)
1	HLJ1	855196	S000004771	HLJ1	Mouse	56323	1930018	Dnajb5		3	2.74	low	No	No	Compara, eggNOG, Phylome		Add	G2F details (Dnajb5) DRscDB Data: (Dnajb5)
1	HLJ1	855196	S000004771	HLJ1	Mouse	66861	1914111	Dnajc10		2	1.91	low	No	No	Phylome, SwiftOrtho		Add	G2F details (Dnajc10) DRscDB Data: (Dnajc10)
1	HLJ1	855196	S000004771	HLJ1	Mouse	56445	1931882	Dnaja2		2	1.91	low	No	No	Phylome, SwiftOrtho		Add	G2F details (Dnaja2) DRscDB Data: (Dnaja2)
1	HLJ1	855196	S000004771	HLJ1	Mouse	67035	1914285	Dnajb4		2	1.81	low	No	No	eggNOG, Phylome		Add	G2F details (Dnajb4) DRscDB Data: (Dnajb4)
Input Order	Search Term	Yeast GeneID	SGDID	Yeast Symbol	Species 2	Rat GeneID	Rat Species Gene ID	Rat Symbol	Ensmbl ID (link HPA)	DIOPT Score	Weighted Score	Rank	Best Score	Best Score Reverse	Prediction Derived From	Alignment & Scores	Feedback	Gene Details
1	HLJ1	855196	S000004771	HLJ1	Rat	499716	1591949	Dnajb14		10	9.75	high	Yes	Yes	Compara, Homologene, Domainoid, Hieranoid, OMA, OrthoInspector, orthoMCL, Phylome, SonicParanoid, SwiftOrtho		Add	G2F details (Dnajb14)
1	HLJ1	855196	S000004771	HLJ1	Rat	294513	1359677	Dnajb12		10	9.65	high	Yes	Yes	Compara, eggNOG, Domainoid, Hieranoid, OMA, OrthoInspector, orthoMCL, Phylome, SonicParanoid, SwiftOrtho		Add	G2F details (Dnajb12)
1	HLJ1	855196	S000004771	HLJ1	Rat	291677	1310237	Dnajc18		7	6.82	moderate	No	Yes	eggNOG, Domainoid, Hieranoid, OMA, Phylome, SonicParanoid, SwiftOrtho		Add	G2F details (Dnajc18)
1	HLJ1	855196	S000004771	HLJ1	Rat	56764	708544	Samd13		5	4.79	moderate	No	Yes	Compara, eggNOG, Inparanoid, Phylome, SwiftOrtho		Add	G2F details (Samd13)
1	HLJ1	855196	S000004771	HLJ1	Rat	689593	1591035	Dnajb2		5	4.79	moderate	No	Yes	Compara, eggNOG, Inparanoid, Phylome, SwiftOrtho		Add	G2F details (Dnajb2)
1	HLJ1	855196	S000004771	HLJ1	Rat	680216	1594215	Dnajb3		5	4.79	moderate	No	Yes	Compara, eggNOG, Inparanoid, Phylome, SwiftOrtho		Add	G2F details (Dnajb3)
1	HLJ1	855196	S000004771	HLJ1	Rat	685839	1589047	Dnajb7		5	4.79	moderate	No	Yes	Compara, eggNOG, Inparanoid, Phylome, SwiftOrtho		Add	G2F details (Dnajb7)
1	HLJ1	855196	S000004771	HLJ1	Rat	362293	1308207	Dnajb6		5	4.79	moderate	No	Yes	Compara, eggNOG, Inparanoid, Phylome, SwiftOrtho		Add	G2F details (Dnajb6)
1	HLJ1	855196	S000004771	HLJ1	Rat	24908	3070	Dnajb9		4	3.77	moderate	No	Yes	eggNOG, TreeFam, Phylome, SwiftOrtho		Add	G2F details (Dnajb9)
1	HLJ1	855196	S000004771	HLJ1	Rat	313811	1307453	Dnajb5		4	3.74	moderate	No	No	Compara, eggNOG, Phylome, SwiftOrtho		Add	G2F details (Dnajb5)
1	HLJ1	855196	S000004771	HLJ1	Rat	114481	620489	Dnajc14		3	2.91	moderate	No	Yes	OrthoFinder, Phylome, SwiftOrtho		Add	G2F details (Dnajc14)
1	HLJ1	855196	S000004771	HLJ1	Rat	500253	1561981	Dnajb8		3	2.89	moderate	No	Yes	Compara, Inparanoid, Phylome		Add	G2F details (Dnajb8)
1	HLJ1	855196	S000004771	HLJ1	Rat	362666	1307731	Dnajc11		2	1.91	moderate	No	Yes	Phylome, SwiftOrtho		Add	G2F details (Dnajc11)
1	HLJ1	855196	S000004771	HLJ1	Rat	303536	1303226	Dnajc7		2	1.91	moderate	No	Yes	Phylome, SwiftOrtho		Add	G2F details (Dnajc7)
1	HLJ1	855196	S000004771	HLJ1	Rat	361384	1304725	Dnajb1		3	2.84	low	No	No	Compara, Phylome, SwiftOrtho		Add	G2F details (Dnajb1)
1	HLJ1	855196	S000004771	HLJ1	Rat	295549	1305826	Dnajb4		3	2.81	low	No	No	eggNOG, Phylome, SwiftOrtho		Add	G2F details (Dnajb4)
1	HLJ1	855196	S000004771	HLJ1	Rat	308857	1359131	Dnajb13		3	2.81	low	No	No	eggNOG, Phylome, SwiftOrtho		Add	G2F details (Dnajb13)
1	HLJ1	855196	S000004771	HLJ1	Rat	362652	1359395	Dnajc16		2	1.91	low	No	No	Phylome, SwiftOrtho		Add	G2F details (Dnajc16)
1	HLJ1	855196	S000004771	HLJ1	Rat	366567	1307426	Dnajc5g		2	1.91	low	No	No	Phylome, SwiftOrtho		Add	G2F details (Dnajc5g)
1	HLJ1	855196	S000004771	HLJ1	Rat	311329	1308015	Dnajc17		2	1.91	low	No	No	Phylome, SwiftOrtho		Add	G2F details (Dnajc17)
1	HLJ1	855196	S000004771	HLJ1	Rat	295690	1307813	Dnajc10		2	1.91	low	No	No	Phylome, SwiftOrtho		Add	G2F details (Dnajc10)
1	HLJ1	855196	S000004771	HLJ1	Rat	300721	1310035	Dnaja4		2	1.91	low	No	No	Phylome, SwiftOrtho		Add	G2F details (Dnaja4)
1	HLJ1	855196	S000004771	HLJ1	Rat	65028	620942	Dnaja1		2	1.91	low	No	No	Phylome, SwiftOrtho		Add	G2F details (Dnaja1)
1	HLJ1	855196	S000004771	HLJ1	Rat	84026	71001	Dnaja2		2	1.91	low	No	No	Phylome, SwiftOrtho		Add	G2F details (Dnaja2)
Input Order	Search Term	Yeast GeneID	SGDID	Yeast Symbol	Species 2	Western clawed frog GeneID	Western clawed frog Species Gene ID	Western clawed frog Symbol	Ensmbl ID (link HPA)	DIOPT Score	Weighted Score	Rank	Best Score	Best Score Reverse	Prediction Derived From	Alignment & Scores	Feedback	Gene Details
1	HLJ1	855196	S000004771	HLJ1	Western clawed frog	549342	XB-GENE-952313	dnajb14		6	5.92	high	Yes	Yes	Homologene, Domainoid, Hieranoid, OMA, Phylome, SonicParanoid		Add	G2F details (dnajb14)
1	HLJ1	855196	S000004771	HLJ1	Western clawed frog	548745	XB-GENE-944288	dnajb12		4	4.03	moderate	No	Yes	Domainoid, OrthoInspector, RoundUp, SonicParanoid		Add	G2F details (dnajb12)
1	HLJ1	855196	S000004771	HLJ1	Western clawed frog	100124938	XB-GENE-5795683	dnajc18		3	2.91	moderate	No	Yes	Domainoid, Phylome, SonicParanoid		Add	G2F details (dnajc18)
1	HLJ1	855196	S000004771	HLJ1	Western clawed frog	548454	XB-GENE-951530	dnajb2		2	1.96	moderate	No	Yes	Inparanoid, Phylome		Add	G2F details (dnajb2)
1	HLJ1	855196	S000004771	HLJ1	Western clawed frog	394712	XB-GENE-972413	dnajb6		2	1.96	moderate	No	Yes	Inparanoid, Phylome		Add	G2F details (dnajb6)
1	HLJ1	855196	S000004771	HLJ1	Western clawed frog	780038	XB-GENE-942676	dnajc11		2	1.91	moderate	No	Yes	Phylome, SwiftOrtho		Add	G2F details (dnajc11)
1	HLJ1	855196	S000004771	HLJ1	Western clawed frog	496977	XB-GENE-997043	dnajc3		2	1.91	low	No	No	Phylome, SwiftOrtho		Add	G2F details (dnajc3)
1	HLJ1	855196	S000004771	HLJ1	Western clawed frog	100145451	XB-GENE-5718163	dnaja3		2	1.91	low	No	No	Phylome, SwiftOrtho		Add	G2F details (dnaja3)
Input Order	Search Term	Yeast GeneID	SGDID	Yeast Symbol	Species 2	Zebrafish GeneID	Zebrafish Species Gene ID	Zebrafish Symbol	Ensmbl ID (link HPA)	DIOPT Score	Weighted Score	Rank	Best Score	Best Score Reverse	Prediction Derived From	Alignment & Scores	Feedback	Gene Details
1	HLJ1	855196	S000004771	HLJ1	Zebrafish	324005	ZDB-GENE-030131-2725	dnajb12a		10	9.68	high	Yes	Yes	Compara, eggNOG, Domainoid, Hieranoid, OMA, orthoMCL, Phylome, RoundUp, SonicParanoid, SwiftOrtho		Add	G2F details (dnajb12a) DRscDB Data: (dnajb12a)
1	HLJ1	855196	S000004771	HLJ1	Zebrafish	792752	ZDB-GENE-061110-138	dnajb14		10	9.68	high	Yes	Yes	Compara, eggNOG, Homologene, Domainoid, Hieranoid, OMA, orthoMCL, Phylome, RoundUp, SonicParanoid		Add	G2F details (dnajb14) DRscDB Data: (dnajb14)
1	HLJ1	855196	S000004771	HLJ1	Zebrafish	100037354	ZDB-GENE-070410-128	dnajb12b		9	8.78	moderate	No	Yes	Compara, Domainoid, Hieranoid, OMA, OrthoInspector, orthoMCL, Phylome, RoundUp, SonicParanoid		Add	G2F details (dnajb12b) DRscDB Data: (dnajb12b)
1	HLJ1	855196	S000004771	HLJ1	Zebrafish	559928	ZDB-GENE-030131-8019	dnajc18		8	7.78	moderate	No	Yes	Compara, eggNOG, Domainoid, Hieranoid, OMA, Phylome, RoundUp, SonicParanoid		Add	G2F details (dnajc18) DRscDB Data: (dnajc18)
1	HLJ1	855196	S000004771	HLJ1	Zebrafish	561686	ZDB-GENE-061013-537	dnajb2		4	3.79	moderate	No	Yes	Compara, eggNOG, Inparanoid, Phylome		Add	G2F details (dnajb2) DRscDB Data: (dnajb2)
1	HLJ1	855196	S000004771	HLJ1	Zebrafish	641576	ZDB-GENE-051127-45	zgc:122979		4	3.74	moderate	No	No	Compara, eggNOG, Phylome, SwiftOrtho		Add	G2F details (zgc:122979) DRscDB Data: (zgc:122979)
1	HLJ1	855196	S000004771	HLJ1	Zebrafish	436626	ZDB-GENE-040718-45	dnajb6a		3	2.89	moderate	No	Yes	Compara, Inparanoid, Phylome		Add	G2F details (dnajb6a) DRscDB Data: (dnajb6a)
1	HLJ1	855196	S000004771	HLJ1	Zebrafish	393275	ZDB-GENE-040426-1122	dnajb6b		3	2.89	moderate	No	Yes	Compara, Inparanoid, Phylome		Add	G2F details (dnajb6b) DRscDB Data: (dnajb6b)
1	HLJ1	855196	S000004771	HLJ1	Zebrafish	101884054	ZDB-GENE-061013-762	zgc:152986		3	2.77	moderate	No	Yes	eggNOG, TreeFam, Phylome		Add	G2F details (zgc:152986) DRscDB Data: (zgc:152986)
1	HLJ1	855196	S000004771	HLJ1	Zebrafish	436706	ZDB-GENE-040718-130	dnajc9		2	1.91	moderate	No	Yes	Phylome, SwiftOrtho		Add	G2F details (dnajc9) DRscDB Data: (dnajc9)
1	HLJ1	855196	S000004771	HLJ1	Zebrafish	393216	ZDB-GENE-040426-894	dnajc17		2	1.91	moderate	No	Yes	Phylome, SwiftOrtho		Add	G2F details (dnajc17) DRscDB Data: (dnajc17)
1	HLJ1	855196	S000004771	HLJ1	Zebrafish	100535820	ZDB-GENE-121105-7	dnajc14		2	1.91	moderate	No	Yes	OrthoFinder, Phylome		Add	G2F details (dnajc14) DRscDB Data: (dnajc14)
1	HLJ1	855196	S000004771	HLJ1	Zebrafish	565734	ZDB-GENE-131121-532	dnajc30b		2	1.91	moderate	No	Yes	Phylome, SwiftOrtho		Add	G2F details (dnajc30b) DRscDB Data: (dnajc30b)
1	HLJ1	855196	S000004771	HLJ1	Zebrafish	445061	ZDB-GENE-040801-192	dnajb4		3	2.81	low	No	No	eggNOG, Phylome, SwiftOrtho		Add	G2F details (dnajb4) DRscDB Data: (dnajb4)
1	HLJ1	855196	S000004771	HLJ1	Zebrafish	327244	ZDB-GENE-030131-5455	dnajb1b		3	2.74	low	No	No	Compara, eggNOG, Phylome		Add	G2F details (dnajb1b) DRscDB Data: (dnajb1b)
1	HLJ1	855196	S000004771	HLJ1	Zebrafish	569466	ZDB-GENE-070705-308	dnajb5		3	2.74	low	No	No	Compara, eggNOG, Phylome		Add	G2F details (dnajb5) DRscDB Data: (dnajb5)
1	HLJ1	855196	S000004771	HLJ1	Zebrafish	557858	ZDB-GENE-070327-1	dnajc10		2	1.91	low	No	No	Phylome, SwiftOrtho		Add	G2F details (dnajc10) DRscDB Data: (dnajc10)
1	HLJ1	855196	S000004771	HLJ1	Zebrafish	797196	ZDB-GENE-070801-3	dnajc12		2	1.91	low	No	No	Phylome, SwiftOrtho		Add	G2F details (dnajc12) DRscDB Data: (dnajc12)
1	HLJ1	855196	S000004771	HLJ1	Zebrafish	554091	ZDB-GENE-050522-76	dnajb9b		2	1.87	low	No	No	TreeFam, Phylome		Add	G2F details (dnajb9b) DRscDB Data: (dnajb9b)
1	HLJ1	855196	S000004771	HLJ1	Zebrafish	445177	ZDB-GENE-040801-90	dnajb1a		2	1.84	low	No	No	Compara, Phylome		Add	G2F details (dnajb1a) DRscDB Data: (dnajb1a)
Input Order	Search Term	Yeast GeneID	SGDID	Yeast Symbol	Species 2	Fly GeneID	Fly Species Gene ID	Fly Symbol	Ensmbl ID (link HPA)	DIOPT Score	Weighted Score	Rank	Best Score	Best Score Reverse	Prediction Derived From	Alignment & Scores	Feedback	Gene Details
1	HLJ1	855196	S000004771	HLJ1	Fly	41707	FBgn0038195	CG3061		8	7.8	high	Yes	Yes	eggNOG, Hieranoid, Inparanoid, OMA, orthoMCL, Phylome, RoundUp, SonicParanoid		Add	G2F details (CG3061) DRscDB Data: (CG3061)
1	HLJ1	855196	S000004771	HLJ1	Fly	246488	FBgn0050156	CG30156		4	3.79	moderate	No	Yes	Compara, eggNOG, Inparanoid, Phylome		Add	G2F details (CG30156) DRscDB Data: (CG30156)
1	HLJ1	855196	S000004771	HLJ1	Fly	40566	FBgn0037252	CG14650		2	1.91	moderate	No	Yes	OrthoFinder, Phylome		Add	G2F details (CG14650) DRscDB Data: (CG14650)
1	HLJ1	855196	S000004771	HLJ1	Fly	36797	FBgn0034091	mrj		2	1.81	moderate	No	Yes	eggNOG, Phylome		Add	G2F details (mrj) DRscDB Data: (mrj)
1	HLJ1	855196	S000004771	HLJ1	Fly	40450	FBgn0037151	CG7130		2	1.81	moderate	No	Yes	eggNOG, Phylome		Add	G2F details (CG7130) DRscDB Data: (CG7130)
1	HLJ1	855196	S000004771	HLJ1	Fly	32683	FBgn0030805	wus		2	1.81	moderate	No	Yes	eggNOG, Phylome		Add	G2F details (wus) DRscDB Data: (wus)
1	HLJ1	855196	S000004771	HLJ1	Fly	318135	FBgn0052640	CG32640		2	1.81	moderate	No	Yes	eggNOG, Phylome		Add	G2F details (CG32640) DRscDB Data: (CG32640)
1	HLJ1	855196	S000004771	HLJ1	Fly	318136	FBgn0052641	CG32641		2	1.81	moderate	No	Yes	eggNOG, Phylome		Add	G2F details (CG32641) DRscDB Data: (CG32641)
1	HLJ1	855196	S000004771	HLJ1	Fly	40953	FBgn0037544	CG11035		2	1.81	low	No	No	eggNOG, Phylome		Add	G2F details (CG11035) DRscDB Data: (CG11035)
1	HLJ1	855196	S000004771	HLJ1	Fly	38643	FBgn0263106	DnaJ-1		2	1.81	low	No	No	eggNOG, Phylome		Add	G2F details (DnaJ-1) DRscDB Data: (DnaJ-1)
1	HLJ1	855196	S000004771	HLJ1	Fly	38233	FBgn0035273	CG12020		2	1.81	low	No	No	eggNOG, Phylome		Add	G2F details (CG12020) DRscDB Data: (CG12020)
1	HLJ1	855196	S000004771	HLJ1	Fly	33308	FBgn0031322	CG5001		2	1.81	low	No	No	eggNOG, Phylome		Add	G2F details (CG5001) DRscDB Data: (CG5001)
1	HLJ1	855196	S000004771	HLJ1	Fly	31978	FBgn0030207	CG2887		2	1.81	low	No	No	eggNOG, Phylome		Add	G2F details (CG2887) DRscDB Data: (CG2887)
Input Order	Search Term	Yeast GeneID	SGDID	Yeast Symbol	Species 2	Mosquito GeneID	Mosquito Species Gene ID	Mosquito Symbol	Ensmbl ID (link HPA)	DIOPT Score	Weighted Score	Rank	Best Score	Best Score Reverse	Prediction Derived From	Alignment & Scores	Feedback	Gene Details
1	HLJ1	855196	S000004771	HLJ1	Mosquito	4577058	AGAP001859	AgaP_AGAP001859		5	4.92	high	Yes	Yes	Homologene, Hieranoid, OMA, Phylome, SonicParanoid		Add	G2F details (AgaP_AGAP001859)
1	HLJ1	855196	S000004771	HLJ1	Mosquito	1281303	AGAP001810	AgaP_AGAP001810		5	4.82	high	Yes	Yes	eggNOG, Hieranoid, OMA, Phylome, SonicParanoid		Add	G2F details (AgaP_AGAP001810)
1	HLJ1	855196	S000004771	HLJ1	Mosquito	1273576	AGAP002386	AgaP_AGAP002386		2	1.91	moderate	No	Yes	OrthoFinder, Phylome		Add	G2F details (AgaP_AGAP002386)
1	HLJ1	855196	S000004771	HLJ1	Mosquito	1278667	AGAP001070	AgaP_AGAP001070		2	1.81	moderate	No	Yes	eggNOG, Phylome		Add	G2F details (AgaP_AGAP001070)
1	HLJ1	855196	S000004771	HLJ1	Mosquito	1271462	AGAP003729	AgaP_AGAP003729		2	1.81	moderate	No	Yes	eggNOG, Phylome		Add	G2F details (AgaP_AGAP003729)
1	HLJ1	855196	S000004771	HLJ1	Mosquito	1280492	AGAP012194	AgaP_AGAP012194		2	1.81	low	No	No	eggNOG, Phylome		Add	G2F details (AgaP_AGAP012194)
1	HLJ1	855196	S000004771	HLJ1	Mosquito	1269995	AGAP007107	AgaP_AGAP007107		2	1.81	low	No	No	eggNOG, Phylome		Add	G2F details (AgaP_AGAP007107)
1	HLJ1	855196	S000004771	HLJ1	Mosquito	1279661	AGAP010239	AgaP_AGAP010239		2	1.81	low	No	No	eggNOG, Phylome		Add	G2F details (AgaP_AGAP010239)
Input Order	Search Term	Yeast GeneID	SGDID	Yeast Symbol	Species 2	Worm GeneID	Worm Species Gene ID	Worm Symbol	Ensmbl ID (link HPA)	DIOPT Score	Weighted Score	Rank	Best Score	Best Score Reverse	Prediction Derived From	Alignment & Scores	Feedback	Gene Details
1	HLJ1	855196	S000004771	HLJ1	Worm	178040	WBGene00001019	dnj-1		8	7.85	high	Yes	Yes	Domainoid, Hieranoid, OMA, OrthoInspector, orthoMCL, Phylome, RoundUp, SonicParanoid		Add	G2F details (dnj-1)
1	HLJ1	855196	S000004771	HLJ1	Worm	3564910	WBGene00001031	dnj-13		4	3.74	moderate	No	No	Compara, eggNOG, Phylome, SwiftOrtho		Add	G2F details (dnj-13)
1	HLJ1	855196	S000004771	HLJ1	Worm	178171	WBGene00001044	dnj-26		3	2.81	moderate	No	Yes	eggNOG, OrthoInspector, Phylome		Add	G2F details (dnj-26)
1	HLJ1	855196	S000004771	HLJ1	Worm	174093	WBGene00001026	dnj-8		2	1.91	moderate	No	Yes	Phylome, SwiftOrtho		Add	G2F details (dnj-8)
1	HLJ1	855196	S000004771	HLJ1	Worm	180746	WBGene00001032	dnj-14		2	1.91	moderate	No	Yes	Phylome, SwiftOrtho		Add	G2F details (dnj-14)
1	HLJ1	855196	S000004771	HLJ1	Worm	3565862	WBGene00001037	dnj-19		2	1.91	low	No	No	Phylome, SwiftOrtho		Add	G2F details (dnj-19)
1	HLJ1	855196	S000004771	HLJ1	Worm	175616	WBGene00001036	dnj-18		2	1.91	low	No	No	Phylome, SwiftOrtho		Add	G2F details (dnj-18)
1	HLJ1	855196	S000004771	HLJ1	Worm	175540	WBGene00001034	dnj-16		2	1.91	low	No	No	Phylome, SwiftOrtho		Add	G2F details (dnj-16)
1	HLJ1	855196	S000004771	HLJ1	Worm	174451	WBGene00001041	dnj-23		2	1.91	low	No	No	Phylome, SwiftOrtho		Add	G2F details (dnj-23)
1	HLJ1	855196	S000004771	HLJ1	Worm	173341	WBGene00001030	dnj-12		2	1.91	low	No	No	Phylome, SwiftOrtho		Add	G2F details (dnj-12)
1	HLJ1	855196	S000004771	HLJ1	Worm	176241	WBGene00018836	F54F2.9		2	1.91	low	No	No	Phylome, SwiftOrtho		Add	G2F details (F54F2.9)
1	HLJ1	855196	S000004771	HLJ1	Worm	176211	WBGene00001028	dnj-10		2	1.91	low	No	No	Phylome, SwiftOrtho		Add	G2F details (dnj-10)
1	HLJ1	855196	S000004771	HLJ1	Worm	175745	WBGene00001042	dnj-24		2	1.81	low	No	No	eggNOG, Phylome		Add	G2F details (dnj-24)
Input Order	Search Term	Yeast GeneID	SGDID	Yeast Symbol	Species 2	Fission yeast GeneID	Fission yeast Species Gene ID	Fission yeast Symbol	Ensmbl ID (link HPA)	DIOPT Score	Weighted Score	Rank	Best Score	Best Score Reverse	Prediction Derived From	Alignment & Scores	Feedback	Gene Details
1	HLJ1	855196	S000004771	HLJ1	Fission yeast	2540130	SPBC17A3.05c	SPBC17A3.05c		9	8.75	high	Yes	Yes	eggNOG, Homologene, Hieranoid, OMA, OrthoInspector, orthoMCL, Phylome, RoundUp, SonicParanoid		Add	G2F details (SPBC17A3.05c)
1	HLJ1	855196	S000004771	HLJ1	Fission yeast	2539451	SPCC63.13	SPCC63.13		3	2.86	moderate	No	Yes	eggNOG, Inparanoid, Phylome		Add	G2F details (SPCC63.13)
1	HLJ1	855196	S000004771	HLJ1	Fission yeast	2539951	SPBC11B10.05c	rsp1		2	1.81	low	No	No	eggNOG, Phylome		Add	G2F details (rsp1)
1	HLJ1	855196	S000004771	HLJ1	Fission yeast	2543511	SPAC4G9.19	SPAC4G9.19		2	1.81	low	No	No	eggNOG, Phylome		Add	G2F details (SPAC4G9.19)
1	HLJ1	855196	S000004771	HLJ1	Fission yeast	2543534	SPAC926.05c	dph4		2	1.81	low	No	No	eggNOG, Phylome		Add	G2F details (dph4)
1	HLJ1	855196	S000004771	HLJ1	Fission yeast	2540016	SPBC1773.09c	mug184		2	1.81	low	No	No	eggNOG, Phylome		Add	G2F details (mug184)
1	HLJ1	855196	S000004771	HLJ1	Fission yeast	2539002	SPCC830.07c	psi1		2	1.81	low	No	No	eggNOG, Phylome		Add	G2F details (psi1)
Input Order	Search Term	Yeast GeneID	SGDID	Yeast Symbol	Species 2	Thale cress GeneID	Thale cress Species Gene ID	Thale cress Symbol	Ensmbl ID (link HPA)	DIOPT Score	Weighted Score	Rank	Best Score	Best Score Reverse	Prediction Derived From	Alignment & Scores	Feedback	Gene Details
1	HLJ1	855196	S000004771	HLJ1	Thale cress	834965	AT5G49060	AT5G49060		7	6.72	high	Yes	Yes	eggNOG, Hieranoid, OMA, OrthoInspector, orthoMCL, Phylome, SonicParanoid		Add	G2F details (AT5G49060)
1	HLJ1	855196	S000004771	HLJ1	Thale cress	830459	AT5G05750	AT5G05750		7	6.72	high	Yes	Yes	eggNOG, Hieranoid, OMA, OrthoInspector, orthoMCL, Phylome, SonicParanoid		Add	G2F details (AT5G05750)
1	HLJ1	855196	S000004771	HLJ1	Thale cress	824901	AT3G57340	AT3G57340		7	6.72	high	Yes	Yes	eggNOG, Hieranoid, OMA, OrthoInspector, orthoMCL, Phylome, SonicParanoid		Add	G2F details (AT3G57340)
1	HLJ1	855196	S000004771	HLJ1	Thale cress	836080	AT5G59610	AT5G59610		4	3.77	moderate	No	Yes	eggNOG, TreeFam, Phylome, SwiftOrtho		Add	G2F details (AT5G59610)
1	HLJ1	855196	S000004771	HLJ1	Thale cress	844244	AT1G79030	AT1G79030		3	2.91	moderate	No	Yes	OrthoFinder, Phylome, SwiftOrtho		Add	G2F details (AT1G79030)
1	HLJ1	855196	S000004771	HLJ1	Thale cress	827699	AT4G19570	AT4G19570		3	2.87	moderate	No	Yes	TreeFam, Phylome, SwiftOrtho		Add	G2F details (AT4G19570)
1	HLJ1	855196	S000004771	HLJ1	Thale cress	835396	AT5G53150	AT5G53150		3	2.87	moderate	No	Yes	TreeFam, Phylome, SwiftOrtho		Add	G2F details (AT5G53150)
1	HLJ1	855196	S000004771	HLJ1	Thale cress	818119	AT2G35540	AT2G35540		3	2.87	moderate	No	Yes	TreeFam, Phylome, SwiftOrtho		Add	G2F details (AT2G35540)
1	HLJ1	855196	S000004771	HLJ1	Thale cress	815071	AT2G05230	AT2G05230		3	2.87	moderate	No	Yes	TreeFam, Phylome, SwiftOrtho		Add	G2F details (AT2G05230)
1	HLJ1	855196	S000004771	HLJ1	Thale cress	815073	AT2G05250	AT2G05250		3	2.87	moderate	No	Yes	TreeFam, Phylome, SwiftOrtho		Add	G2F details (AT2G05250)
1	HLJ1	855196	S000004771	HLJ1	Thale cress	842083	AT1G56300	AT1G56300		3	2.81	moderate	No	Yes	eggNOG, Phylome, SwiftOrtho		Add	G2F details (AT1G56300)
1	HLJ1	855196	S000004771	HLJ1	Thale cress	818700	AT2G41000	AT2G41000		3	2.81	moderate	No	Yes	eggNOG, Phylome, SwiftOrtho		Add	G2F details (AT2G41000)
1	HLJ1	855196	S000004771	HLJ1	Thale cress	817939	AT2G33735	AT2G33735		3	2.81	moderate	No	Yes	eggNOG, Phylome, SwiftOrtho		Add	G2F details (AT2G33735)
1	HLJ1	855196	S000004771	HLJ1	Thale cress	820637	AT3G14200	AT3G14200		3	2.81	moderate	No	Yes	eggNOG, Phylome, SwiftOrtho		Add	G2F details (AT3G14200)
1	HLJ1	855196	S000004771	HLJ1	Thale cress	820049	AT3G08970	ATERDJ3A		3	2.77	moderate	No	Yes	eggNOG, TreeFam, Phylome		Add	G2F details (ATERDJ3A)
1	HLJ1	855196	S000004771	HLJ1	Thale cress	838237	AT1G16680	AT1G16680		2	2	moderate	No	Yes	OrthoFinder, SwiftOrtho		Add	G2F details (AT1G16680)
1	HLJ1	855196	S000004771	HLJ1	Thale cress	833720	AT5G37440	AT5G37440		2	1.91	moderate	No	Yes	Phylome, SwiftOrtho		Add	G2F details (AT5G37440)
1	HLJ1	855196	S000004771	HLJ1	Thale cress	835020	AT5G49580	AT5G49580		2	1.91	moderate	No	Yes	OrthoFinder, Phylome		Add	G2F details (AT5G49580)
1	HLJ1	855196	S000004771	HLJ1	Thale cress	833753	AT5G37750	AT5G37750		2	1.91	moderate	No	Yes	Phylome, SwiftOrtho		Add	G2F details (AT5G37750)
1	HLJ1	855196	S000004771	HLJ1	Thale cress	5007987	AT3G06778	AT3G06778		2	1.9	moderate	No	Yes	eggNOG, SwiftOrtho		Add	G2F details (AT3G06778)
1	HLJ1	855196	S000004771	HLJ1	Thale cress	827700	AT4G19580	AT4G19580		2	1.87	moderate	No	Yes	TreeFam, Phylome		Add	G2F details (AT4G19580)
1	HLJ1	855196	S000004771	HLJ1	Thale cress	827701	AT4G19590	AT4G19590		2	1.87	moderate	No	Yes	TreeFam, Phylome		Add	G2F details (AT4G19590)
1	HLJ1	855196	S000004771	HLJ1	Thale cress	832782	AT5G27240	AT5G27240		2	1.87	moderate	No	Yes	TreeFam, Phylome		Add	G2F details (AT5G27240)
1	HLJ1	855196	S000004771	HLJ1	Thale cress	831993	AT5G18750	AT5G18750		2	1.87	moderate	No	Yes	TreeFam, Phylome		Add	G2F details (AT5G18750)
1	HLJ1	855196	S000004771	HLJ1	Thale cress	819658	AT3G04980	AT3G04980		2	1.87	moderate	No	Yes	TreeFam, Phylome		Add	G2F details (AT3G04980)
1	HLJ1	855196	S000004771	HLJ1	Thale cress	817094	AT2G25560	AT2G25560		2	1.87	moderate	No	Yes	TreeFam, Phylome		Add	G2F details (AT2G25560)
1	HLJ1	855196	S000004771	HLJ1	Thale cress	835076	AT5G50115	AT5G50115		2	1.86	moderate	No	Yes	eggNOG, TreeFam		Add	G2F details (AT5G50115)
1	HLJ1	855196	S000004771	HLJ1	Thale cress	3767688	AT1G72416	AT1G72416		2	1.81	moderate	No	Yes	eggNOG, Phylome		Add	G2F details (AT1G72416)
1	HLJ1	855196	S000004771	HLJ1	Thale cress	837447	AT1G09260	AT1G09260		2	1.81	moderate	No	Yes	eggNOG, Phylome		Add	G2F details (AT1G09260)
1	HLJ1	855196	S000004771	HLJ1	Thale cress	843439	AT1G71000	AT1G71000		2	1.81	moderate	No	Yes	eggNOG, Phylome		Add	G2F details (AT1G71000)
1	HLJ1	855196	S000004771	HLJ1	Thale cress	831527	AT5G16650	AT5G16650		2	1.81	moderate	No	Yes	eggNOG, Phylome		Add	G2F details (AT5G16650)
1	HLJ1	855196	S000004771	HLJ1	Thale cress	816361	AT2G18465	AT2G18465		2	1.81	moderate	No	Yes	eggNOG, Phylome		Add	G2F details (AT2G18465)
1	HLJ1	855196	S000004771	HLJ1	Thale cress	828965	AT4G28480	AT4G28480		3	2.81	low	No	No	eggNOG, Phylome, SwiftOrtho		Add	G2F details (AT4G28480)
1	HLJ1	855196	S000004771	HLJ1	Thale cress	832628	AT5G25530	AT5G25530		3	2.81	low	No	No	eggNOG, Phylome, SwiftOrtho		Add	G2F details (AT5G25530)
1	HLJ1	855196	S000004771	HLJ1	Thale cress	823949	AT3G47940	AT3G47940		3	2.81	low	No	No	eggNOG, Phylome, SwiftOrtho		Add	G2F details (AT3G47940)
1	HLJ1	855196	S000004771	HLJ1	Thale cress	842265	AT1G59725	AT1G59725		3	2.81	low	No	No	eggNOG, Phylome, SwiftOrtho		Add	G2F details (AT1G59725)
1	HLJ1	855196	S000004771	HLJ1	Thale cress	839715	AT1G28210	ATJ1		2	1.91	low	No	No	Phylome, SwiftOrtho		Add	G2F details (ATJ1)
1	HLJ1	855196	S000004771	HLJ1	Thale cress	816690	AT2G21510	AT2G21510		2	1.91	low	No	No	Phylome, SwiftOrtho		Add	G2F details (AT2G21510)
1	HLJ1	855196	S000004771	HLJ1	Thale cress	816298	AT2G17880	AT2G17880		2	1.91	low	No	No	Phylome, SwiftOrtho		Add	G2F details (AT2G17880)
1	HLJ1	855196	S000004771	HLJ1	Thale cress	820531	AT3G13310	AT3G13310		2	1.91	low	No	No	Phylome, SwiftOrtho		Add	G2F details (AT3G13310)
1	HLJ1	855196	S000004771	HLJ1	Thale cress	834854	AT5G48030	GFA2		2	1.91	low	No	No	Phylome, SwiftOrtho		Add	G2F details (GFA2)
1	HLJ1	855196	S000004771	HLJ1	Thale cress	842292	AT1G59980	ARL2		2	1.91	low	No	No	Phylome, SwiftOrtho		Add	G2F details (ARL2)
1	HLJ1	855196	S000004771	HLJ1	Thale cress	832267	AT5G22060	J2		2	1.91	low	No	No	Phylome, SwiftOrtho		Add	G2F details (J2)
1	HLJ1	855196	S000004771	HLJ1	Thale cress	823531	AT3G44110	J3		2	1.91	low	No	No	Phylome, SwiftOrtho		Add	G2F details (J3)
1	HLJ1	855196	S000004771	HLJ1	Thale cress	837574	AT1G10350	AT1G10350		2	1.81	low	No	No	eggNOG, Phylome		Add	G2F details (AT1G10350)
1	HLJ1	855196	S000004771	HLJ1	Thale cress	826604	AT4G10130	AT4G10130		2	1.81	low	No	No	eggNOG, Phylome		Add	G2F details (AT4G10130)
1	HLJ1	855196	S000004771	HLJ1	Thale cress	831415	AT5G01390	AT5G01390		2	1.81	low	No	No	eggNOG, Phylome		Add	G2F details (AT5G01390)
1	HLJ1	855196	S000004771	HLJ1	Thale cress	816578	AT2G20560	AT2G20560		2	1.81	low	No	No	eggNOG, Phylome		Add	G2F details (AT2G20560)
1	HLJ1	855196	S000004771	HLJ1	Thale cress	820040	AT3G08910	AT3G08910		2	1.81	low	No	No	eggNOG, Phylome		Add	G2F details (AT3G08910)
Input Order	Search Term	Yeast GeneID	SGDID	Yeast Symbol	Species 2	E. coli GeneID	E. coli Species Gene ID	E. coli Symbol	Ensmbl ID (link HPA)	DIOPT Score	Weighted Score	Rank	Best Score	Best Score Reverse
1	HLJ1	855196	S000004771	HLJ1	E. coli	947572	EG12193	cbpA		2	1.91	moderate	Yes	No
